# Supplementary material
Source: Elsevier journal article supplement (https://www.sciencedirect.com/science/article/pii/S0214460320300905)

**Anexo 1. Cuestionario sobre Intervención Logopédica en Entornos Multilingües (CILEM)**

Estimado/a logopeda,

A continuación, te presentamos un cuestionario sobre bilingüismo y multilingüismo en logopedia. Consideramos que el aumento de personas en entornos multilingües en la última década requiere revisar y actualizar el concepto de logopedia bilingüe y multilingüe.

Con este material, que ha sido elaborado a partir de los trabajos de Kritikos (2003), Jordaan (2008) y Williams y McLeod (2012), queremos conocer la situación de la intervención logopédica con personas de entornos lingüística y culturalmente diversos. Además, será especialmente útil estudiar cómo se enfrenta el profesional de la logopedia a estos nuevos retos.

Solicitamos tu colaboración en este estudio y te agradeceríamos que completases este cuestionario basándote en tu práctica. De este modo, nos ayudarás a realizar un mapa de la situación de la logopedia multilingüe en el Estado y en las diferentes Comunidades Autónomas que pueda ser contrastado con la situación de otros países. Además, a partir de los resultados de este trabajo, se podrán elaborar documentos que sirvan para unificar criterios de intervención, así como para diseñar material para orientar a las familias y a los profesionales. Gracias por tu importante colaboración.

El cuestionario es anónimo y los datos recogidos respetan la ley de protección de datos (Ley Orgánica 15/1999, de 13 de diciembre, de Protección de Datos de Carácter Personal).

IMPORTANTE: Para asegurar la fiabilidad de los datos recogidos este cuestionario es para rellenar sólo por personas que ejerzan la profesión de logopeda en España. No es necesario ser bilingüe para rellenarlo. Puedes pasar a rellenar el cuestionario pulsando en la flecha roja abajo a la derecha. Para cualquier duda puedes escribirnos a [logopedia.survey.team@gmail.com](mailto:logopedia.survey.team@gmail.com)

¡Gracias por participar en este estudio!

[**Nombre de las autoras, a cumplimentar cuando esté en versión publicable**]

**EXPERIENCIA LINGÜÍSTICA**
1. ¿Hablas más de una lengua?

Sí (1) No (2)

2. En caso afirmativo, ¿qué lenguas conoces? (no olvides escribir también tu lengua materna)

Lengua 1: __________

Lengua 2: __________

Lengua 3: __________

Lengua 4: __________

Lengua 5: __________

3. Si has respondido al apartado anterior, ordena las lenguas que conoces de mayor a menor dominio en general:

______ Lengua 1

______ Lengua 2

______ Lengua 3

______ Lengua 4

______ Lengua 5

4. ¿Con cuántos años aproximadamente aprendiste las lenguas que conoces?

Lengua 1: __________

Lengua 2: __________

Lengua 3: __________

Lengua 4: __________

Lengua 5: __________

5. ¿Durante cuánto tiempo has estado usando estas lenguas?

Lengua 1: __________

Lengua 2: __________

Lengua 3: __________

Lengua 4: __________

Lengua 5: __________

6. ¿Dónde las aprendiste?

Casa Educación formal/escuela Situaciones sociales Academias/escuelas de idiomas Autoaprendizaje

Lengua 1:

Lengua 2:

Lengua 3:

Lengua 4:

Lengua 5:

7. ¿En qué lengua/s has estudiado?

Lengua (1) Combinada con (indicar otras lenguas en caso necesario)

En Infantil

En Primaria

En Secundaria (o equivalente)

En la Universidad

8. Valora de 1 a 4 tu competencia en cada lengua que conoces (1 poco competente --> 4 muy competente):

Comprensión Oral Comprensión Escrita Expresión Oral Expresión Escrita

Lengua 1:

Lengua 2:

Lengua 3:

Lengua 4:

Lengua 5:

9. Actualmente, ¿hablas en tu día a día una lengua distinta de la lengua que mejor dominas?

Sí (5) No (6)

10. Si tu respuesta es afirmativa, ¿qué lengua/s?:

Lengua 1:

Lengua 2:

Lengua 3:

Lengua 4:

Lengua 5:

11. Si en tu día a día hablas una lengua distinta de la lengua que dominas, ¿dónde la/s utilizas?

(Puedes marcar varias respuestas):

En el trabajo:

En casa:

En situaciones sociales:

En otros entornos:

**CUESTIONES SOBRE BILINGÜISMO Y MULTILINGÜISMO** 
12. ¿Qué es para ti una persona bilingüe/multilingüe?

13. ¿Te consideras una persona bilingüe/multilingüe?

Sí No

14. Indica el grado con el que estás de acuerdo con las siguientes afirmaciones

(1 nada de acuerdo; 4 totalmente de acuerdo; 5 Ns/Nc):

El desarrollo bilingüe mejora las funciones cognitivas.

Aprender dos lenguas a la vez puede confundir a los niños.

Es recomendable que los niños con dificultades del lenguaje o con alguna discapacidad sólo usen una lengua

Las personas que cambian de lengua en una misma conversación son menos bilingües

Sólo se llega a ser bilingüe si cada persona habla una sola lengua siempre (cada padre una)

Los logopedas deben ser bilingües en más de una lengua para atender a usuarios bilingües en esas lenguas

Si no sabes una segunda lengua, sólo puedes intervenir en una primera lengua

**CUESTIONES SOBRE PRÁCTICA PROFESIONAL**

15. ¿Con qué tipo de usuarios y familias sueles trabajar?

16. ¿Cómo contactan contigo? (organismo/centro/entidad del que son derivados hasta tu consulta)

17. Durante tu práctica profesional, ¿te has encontrado con personas susceptibles de necesitar evaluación o intervención logopédica bilingüe o plurilingüe?

Sí No

18. En caso afirmativo, ¿te han llegado casos de bilingües/plurilingües que no has atendido?

19. En el caso de que hayas recibido casos de bilingües/plurilingües que no has atendido ¿qué has hecho?

Los he derivado a logopedas bilingüe

Los he rechazado

Otros:

20. ¿Has trabajado con usuarios bilingües/multilingües en el último año?

Niños Adultos Niños y adultos No

21. En caso afirmativo, ¿qué tipo de alteraciones presentaban?

**CUESTIONES SOBRE LA EVALUACIÓN**

22. ¿Evalúas tú el habla y el lenguaje oral/escrito/la lengua de signos en los casos bilingües/multilingües que tratas?

Sí No

23. En caso afirmativo, ¿qué procedimientos utilizas para valorar el habla y el lenguaje en estos casos?

Puedes marcar varias respuestas (Opcional: Escribe un ejemplo):

Test estandarizados en castellano

Test estandarizados para la lengua dominante distinta del castellano

Test bilingües

Cuestionarios para padres

Evaluación dinámica

Tareas cognitivas

Muestras de lenguaje

Procedimientos informales

Otros:

24. ¿Utilizas procedimientos y/o recursos especiales? (Puedes marcar varias respuestas)

Interpretación cualitativa de los test (1)

Uso de un test para cada lengua (2)

Materiales culturalmente adaptados (3)

Otros (4) ____________________

No utilizo ningún procedimiento o recurso especial. (5)

25. ¿Crees que es necesario que existan test estandarizados con baremos bilingües para evaluar a estos usuarios?

Sí No

26. ¿Has evaluado/intervenido en alguna lengua que no hablas?

Sí No

27. En caso afirmativo, ¿qué personas de apoyo has usado?

En la evaluación En la Intervención En ambas

Padres

Hermanos

Cuidadores

Otros logopedas

Compañeros

Otros

28. ¿Has buscado información para tratar estos casos?

Sí, siempre Sí, a veces No

29. En caso afirmativo, ¿qué tipo de información has buscado?

Fonología en lenguas distintas la lengua que tú mejor dominas

Conocimientos culturales

Otros

**CUESTIONES SOBRE LA INTERVENCIÓN**

30. ¿Has realizado intervención logopédica con usuarios bilingües/multilingües o con exposición a varias lenguas?

Sí No

31. En caso afirmativo, ¿qué tipo de intervención realizas con usuarios bilingües/ multilingües o con exposición a varias lenguas? (Puedes marcar varias respuestas):

Individual

En grupo

Entrenamiento a padres

Entrenamiento a hermanos

Intervención en entornos naturales

Otros ____________________

33. ¿Dónde les evalúas o intervienes? (Puedes marcar varias respuestas):

En contexto clínico (1)

En la escuela (2)

En casa (3)

Otros (4) ____________________

34. ¿Cuándo intervienes en otras lenguas diferentes a la lengua familiar del usuario?

 (Puedes marcar varias respuestas):

Cuando no hablo la lengua familiar del usuario

Cuando no existen recursos disponibles en la lengua familiar del usuario

Otras razones: _________________

Nunca intervengo en una lengua diferente a la familiar

35. En caso de trabajar con personas de entornos cultural y lingüísticamente diversos,

¿trabajas también con las familias de las personas que atiendes en consulta?

Sí No

36. En caso afirmativo, ¿crees que el grado de implicación de la familia influye en los resultados de tu intervención?

Siempre A menudo Alguna vez Nunca

37. ¿Los padres/otros miembros de la familia observan tus sesiones de evaluación o intervención?

Siempre A menudo Alguna vez Nunca

38. ¿Proporcionas orientaciones y tareas para casa a los padres/cuidadores en tu intervención?

Siempre A menudo Alguna vez Nunca

39. ¿Crees que te influye cada familia en cómo les implicas en la intervención?

Siempre A menudo Alguna vez Nunca

40. ¿Recoges información sobre usos culturales y actitudes sobre el aprendizaje del lenguaje?

Siempre A menudo Alguna vez Nunca

41. ¿Recoges información sobre usos y actitudes sobre pautas de crianza/educación?

Siempre A menudo Alguna vez Nunca

42. ¿Has dado recomendaciones/pautas a los padres o cuidadores sobre el uso de lenguas con los niños?

Sí No

43. ¿Qué les has recomendado?

Hablar o signar (en el caso de lengua de signos) sólo en una lengua

Hablar o signar (en el caso de lengua de signos) en más de una lengua

Otras ____________________

44. En caso de recomendar *Hablar o signar una lengua*, ¿cuáles? (Puedes marcar varias respuestas)

La familiar La escolar o la del trabajo La del entorno social

45.Les has aconsejado sobre los contextos y el método de exposición a las lenguas?

Sí No Ns/Nc

46. ¿Crees que los padres han tenido una actitud positiva ante el mantenimiento de una lengua distinta en casa, en la escuela o en la comunidad?

Sí No Ns/Nc

47. Si has dado recomendaciones/pautas a los padres o cuidadores sobre el uso de lenguas con los niños, ¿cuáles son los beneficios que has observado a partir de tus recomendaciones sobre el uso de lengua/s?

**CASO CLÍNICO**

Si durante tu práctica profesional te has encontrado con personas susceptibles de necesitar evaluación, a continuación, queremos pedirte que compartas con nosotras un caso de habla y/o lenguaje de un usuario bilingüe/multilingüe o en estos entornos que hayas tratado. 

48. Describe el más difícil, o que te haya supuesto un reto. Si no deseas compartir un caso, te pedimos que continúes rellenando algunas preguntas para recoger información demográfica

Quiero compartir un caso clínico

Prefiero no compartir un caso clínico, voy a continuar con las siguientes preguntas

____________________________________________________________________________________________________________________________________________________________________________

Gracias por compartir un caso clínico. ¡Empezamos!

49. ¿Qué edad tenía el usuario?

50. ¿Cuál era su sexo?

Niño/ hombre Niña/ mujer Otro

51. ¿Cuántas lenguas estaban implicadas?

Dos lenguas Tres lenguas Más de tres lenguas

52. ¿Cuáles eran estas lenguas?

Lengua familiar: ____________________

Lengua de la calle / entorno social: ____________________

Lengua escolar/de trabajo: ____________________

Otras lenguas: ____________________

53. ¿Podrías describir brevemente su diagnóstico/cuadro clínico?

____________________________________________________________________________________________________________________________________________

54. ¿Por qué consideras que te resultó un caso complicado o interesante?

____________________________________________________________________________________________________________________________________________

55. ¿Evaluaste tú el caso?

Sí No Otra respuesta: _____

56. ¿En qué lengua evaluaste/ evaluasteis? (En relación a tu clasificación anterior sobre las lenguas del usuario. Puedes marcar varias si es necesario)

Lengua familiar:

Lengua de la calle / entorno social:

Lengua escolar/de trabajo:

Otras lenguas

57. ¿Qué método/s utilizaste/utilizasteis para evaluar? (marcar varios si es necesario)

Test estandarizados en castellano

Test estandarizados para la lengua dominante distinta del castellano

Test bilingües

Cuestionarios para padres

Evaluación dinámica

Tareas cognitivas

Muestras de lenguaje

Procedimientos informales

Otros:

58. ¿En qué lengua escribiste el/los informe/s?

Lengua 1

Lengua 2

Lengua 3

Lengua 4

59. ¿Por qué no evaluaste? (indicar lengua y motivo)

No disponible No acceso a intérpretes No recursos Otros motivos

Lengua familiar:

Lengua de la calle/entorno social:

Lengua escolar/trabajo:

Otras lenguas:

60. ¿En qué lengua/s realizaste la intervención?

Lengua familiar:

Lengua de la calle/entorno social:

Lengua escolar/trabajo:

Otras lenguas:

61. ¿Cuál fue la secuencia de intervención? (Arrastra las lenguas a cada cuadro según el orden de intervención)

Intervine simultáneamente en: Lengua familiar, Lengua de la calle, Lengua escolar/trabajo, Otras lenguas

Intervine primero en: Lengua familiar, Lengua de la calle, Lengua escolar/trabajo, Otras lenguas

Intervine después en: Lengua familiar, Lengua de la calle, Lengua escolar/trabajo, Otras lenguas

62. ¿Cuáles son los beneficios que has observado?

____________________________________________________________________________________________________________________________________________

**INFORMACIÓN DEMOGRÁFICA** **Y FORMACIÓN COMO LOGOPEDA**

Ahora nos gustaría que respondieras a unas breves preguntas para recoger información demográfica y sobre tu formación como logopeda. Estas preguntas son fundamentales para organizar la información que recibimos y poder realizar análisis estadísticos. Te recordamos que los datos recogidos se tratarán de forma anónima. Pulsa en la flecha roja abajo a la derecha para seguir respondiendo.

63. Dónde resides actualmente?

CCAA: __________________________________________________

64. ¿En qué año naciste?

_______________

65. ¿Cuál es tu sexo?

Mujer Hombre Otro

66. ¿Qué formación cursaste para ejercer la profesión de logopeda?

Grado en Logopedia

Diplomatura en Logopedia

Otros ____________________

67. ¿En qué universidad o centro de estudios te formaste como logopeda?

68. ¿Podrías indicarnos tu nivel más alto de estudios?

Doctorado Máster Licenciatura Grado Diplomatura

69. ¿En qué lugar trabajas como logopeda?

Clínica / Gabinete privado / Fundación o asociación / Hospital / Domicilio / Colegio / Otros _______

70. ¿Estás colegiado?

Sí No

71. Si estás colegiado/a, ¿en qué colegio?

____________________________________________________________-

72. ¿Eres docente universitario/a?

Sí No

73. Si eres docente universitario/a, ¿en qué universidad trabajas?

____________________________________________________________

74. ¿Has impartido tú algún seminario/taller para formar a logopedas? (sobre cualquier tema)

Sí No

75. ¿Perteneces a alguna asociación/sociedad científica o profesional?

AELFA-IF ALE CPLOL IALP ASHA Otras:____________

76. ¿Sueles leer revistas científicas?

Sí No

77. Si sueles consultar revistas científicas, ¿consideras que la información publicada sobre Práctica Basada en la Evidencia es suficiente para orientar tu práctica clínica?

Sí No Ns/Nc

78. ¿Qué otras fuentes utilizas para contrastar tu práctica profesional?

___________________________________________________________________

79. ¿Qué lengua/s consideras importante/s para tu trabajo como logopeda?

___________________________________________________________________

80. ¿Crees que tu universidad te ha preparado adecuadamente para trabajar con personas en entornos bilingües/multilingües?

Sí No Ns/Nc

81. ¿Consideras que la universidad debería preparar para aprender otras lenguas y para trabajar con personas en entornos bilingües/multilingüe?

Sí No Ns/Nc

82. ¿Has asistido a algún curso/taller recientemente sobre bilingüismo/ multilingüismo?

Sí No Ns/Nc

83. ¿Te gustaría completar tu formación en este campo?

Sí No Ns/Nc

84. En caso afirmativo, ¿qué formación te gustaría recibir sobre bilingüismo/ multilingüismo? Te ofrecemos algunas opciones. Señala, por favor, la que pueda interesarte y/o añade tus propios centros de interés. Puedes seleccionar varias opciones:

Referencia sobre cuál es el desarrollo típico de los bilingües/multilingües

Orientaciones para la intervención en bilingües/multilingües

Información sobre investigaciones recientes sobre lenguaje

Cognición en bilingüismo/multilingüismo

Orientaciones para diferenciar bilingüismo/multilingüismo de hablantes tardíos o retraso de lenguaje

Elaboración de materiales para la intervención logopédica

Competencias culturales.

Otros ____________________

85. En general, ¿cómo crees que podría mejorarse la formación que reciben los logopedas sobre el trabajo con personas en entornos bilingües/multilingües?

___________________________________________________________________

Si has terminado de rellenar el cuestionario, pulsa la flecha roja para enviar tus respuestas. 

Si quieres seguir más adelante completando preguntas que tienes pendientes, déjalo aquí ahora, pues, si continúas, el programa lo dará por terminado. Te recordamos que tienes una semana para completarlo antes de que se borren las respuestas. 

Para cualquier duda puedes escribirnos a [logopedia.survey.team@gmail.com](mailto:logopedia.survey.team@gmail.com)
 
No está permitida la reproducción ni adaptación total o parcial de este cuestionario sin la autorización previa de las autoras.


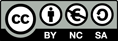

Supplement: mmc1 [file S0214460320300905:mmc1.docx]
